# Supplementary material for: A nondestructive method to estimate the chlorophyll content of Arabidopsis seedlings
Source: PubMed Central journal article supplement (PMC5391588; doi:10.1186/s13007-017-0174-6), 2017-04-14
Supplement: 13007_2017_174_MOESM8_ESM.pdf [file 13007_2017_174_MOESM8_ESM.pdf]

Table S7. The chlorophyll content estimated by RGB value.

|    | row | column | chlorophyll content(ng/mm2) |
|----|-----|--------|-----------------------------|
| 1  | 1   | 1      | 159.522                     |
| 2  | 1   | 2      | 155.212                     |
| 3  | 1   | 3      | 152.971                     |
| 4  | 1   | 4      | 149.466                     |
| 5  | 1   | 5      | 33.439                      |
| 6  | 1   | 6      | 151.412                     |
| 7  | 2   | 1      | 137.406                     |
| 8  | 2   | 2      | 161.738                     |
| 9  | 2   | 3      | 115.086                     |
| 10 | 2   | 4      | 157.351                     |
| 11 | 2   | 5      | 166.794                     |
| 12 | 2   | 6      | 62.181                      |
| 13 | 3   | 1      | 109.046                     |
| 14 | 3   | 2      | 154.116                     |
| 15 | 3   | 3      | 139.313                     |
| 16 | 3   | 4      | 134.92                      |
| 17 | 3   | 5      | 125.919                     |
| 18 | 3   | 6      | 127.459                     |
| 19 | 4   | 1      | 114.466                     |
| 20 | 4   | 2      | 149.465                     |
| 21 | 4   | 3      | 125.738                     |
| 22 | 4   | 4      | 148.235                     |
| 23 | 4   | 5      | 41.628                      |
| 24 | 4   | 6      | 134.199                     |
| 25 | 5   | 1      | 61.765                      |
| 26 | 5   | 2      | 31.744                      |
| 27 | 5   | 3      | 148.452                     |
| 28 | 5   | 4      | 40.68                       |
| 29 | 5   | 5      | 152.128                     |
| 30 | 5   | 6      | 165.127                     |
| 31 | 6   | 1      | 158.239                     |
| 32 | 6   | 2      | 164.719                     |
| 33 | 6   | 3      | 141.529                     |
| 34 | 6   | 4      | 156.279                     |
| 35 | 6   | 5      | 46.432                      |
| 36 | 6   | 6      | 137.508                     |
