# Supplementary material for: A nondestructive method to estimate the chlorophyll content of Arabidopsis seedlings
Source: PubMed Central journal article supplement (PMC5391588; doi:10.1186/s13007-017-0174-6), 2017-04-14

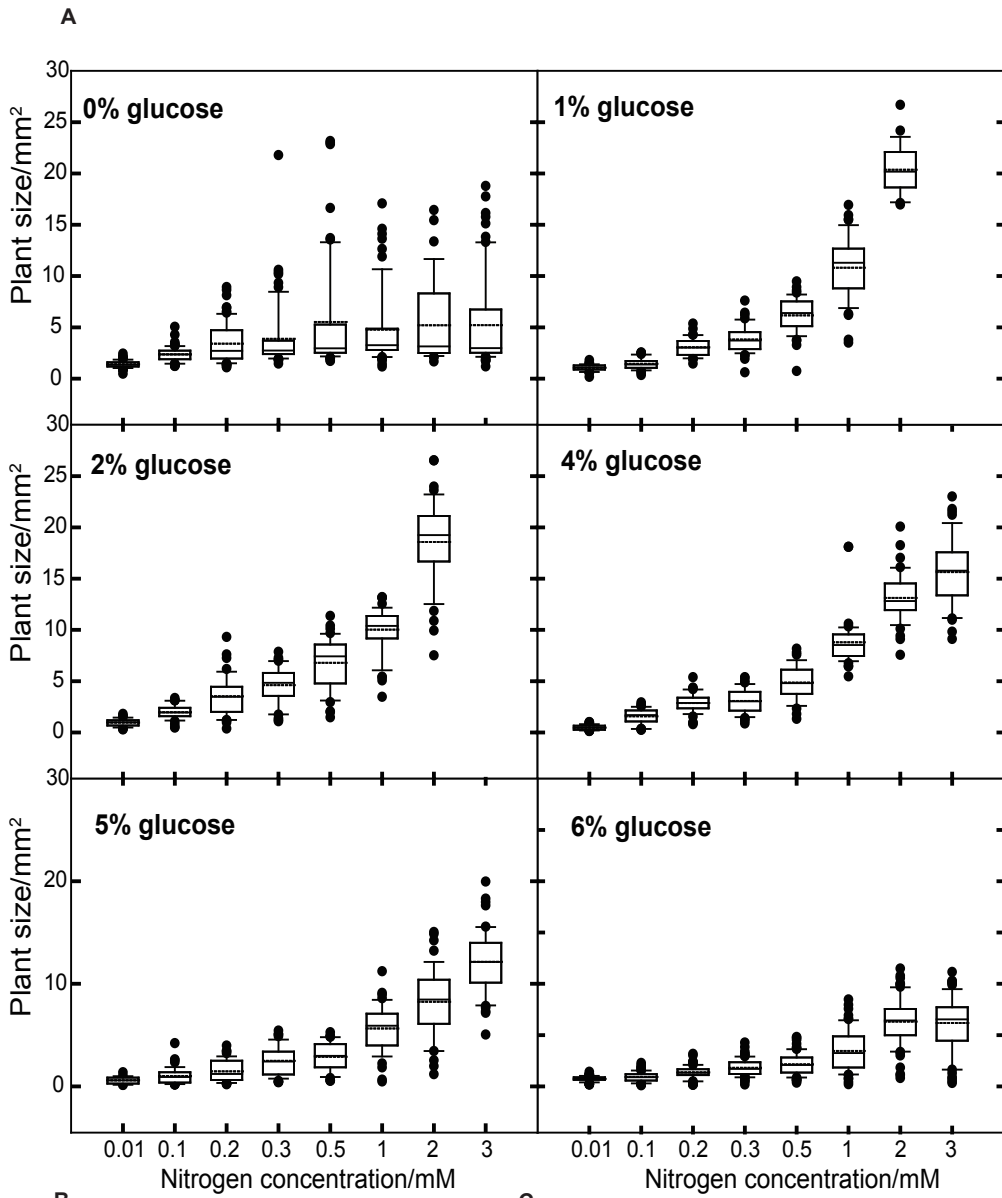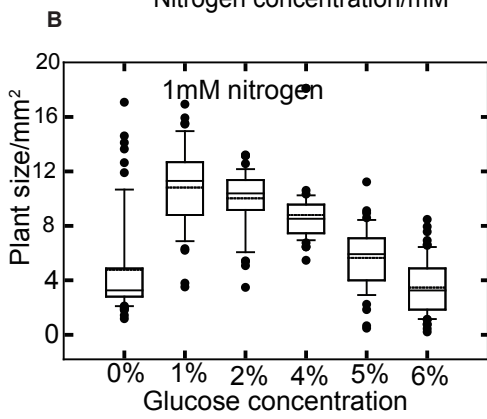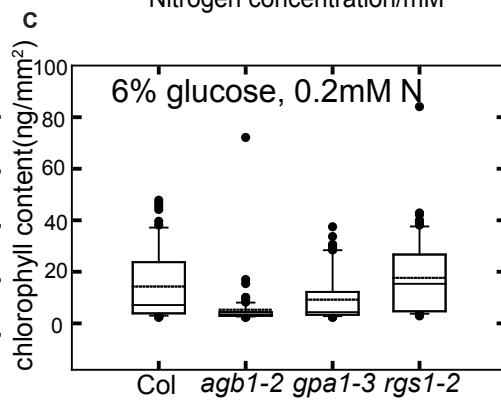

Supplement: 13007_2017_174_MOESM12_ESM.pdf [file 13007_2017_174_MOESM12_ESM.pdf]
